# Supplementary material for: Hip abductor muscle strength in patients after total or unicompartmental knee arthroplasty for knee osteoarthritis or avascular necrosis: a systematic review and meta-analysis protocol
Source: PubMed Central journal article supplement — BMJ Open. 2020 Aug 13;10(8):e038770. doi: 10.1136/bmjopen-2020-038770 (PMC7430403; doi:10.1136/bmjopen-2020-038770), 2020-08-13
Supplement: bmjopen-2020-038770supp002.pdf [file bmjopen-2020-038770supp002.pdf]

# Hip abductor muscle strength in patients after total or unicompartmental knee arthroplasty for knee osteoarthritis or avascular necrosis - Search strategy

## Appendices

### Appendix 1: Search strategies

[Embase.com](https://embase.com)

(20191219; 860 hits)

((('knee osteoarthritis'/de OR (((knee OR femorotibial OR patellofemoral) NEAR/5 (osteoarthriti\* OR arthriti\* OR osteoarthrosis OR osteoarthroses OR arthrosis OR arthroses OR arthropathy OR 'degenerative joint disease\*')) OR 'gonarthrosis'):ab,ti)

AND

('knee arthroplasty'/exp OR 'total knee arthroplasty'/de OR 'arthroplasty'/de OR 'total arthroplasty'/de OR 'knee prosthesis'/de OR 'femoral knee prosthesis'/de OR 'hinge knee prosthesis'/exp OR 'patella prosthesis'/de OR 'patellofemoral prosthesis'/de OR 'tibial knee prosthesis'/de OR 'total knee prosthesis'/de OR 'unicompartmental knee prosthesis'/de OR 'joint prosthesis'/de OR 'endoprosthesis'/de OR 'minimally invasive surgery'/de OR (replacement\* OR reconstruct\* OR arthroplast\* OR prosthes\* OR arthroprosthes\* OR endoprosthes\* OR implant\* OR 'artificial knee\*' OR TKR OR TKA OR (('minimally invasive' OR mini-invasive OR minimal OR 'minimal access') NEAR/3 (surgery OR 'surgical method\*' OR 'surgical procedure\*' OR 'surgical technique\*' OR operation OR 'operative treatment' OR 'operative intervention' OR 'operative repair' OR 'operative restoration')) OR 'Active UKA' OR 'Advance Medial Pivot' OR 'Advantim' OR 'ALPINA PS' OR 'Anatomic Graduated Component' OR 'Ascent' OR 'ATTUNE' OR 'Bi-Surface' OR 'Duracon' OR 'EMPOWER' OR 'Genesis II' OR 'iBalance Unicondylar Knee' OR 'Insall-Burstein II' OR 'InterSpace Knee' OR 'KineMax' OR 'KineSpring' OR 'Legion' OR 'Marmor' OR 'Maxim' OR 'Maximum Congruent Knee system' OR 'Miller-Galante' OR 'Natural Knee II' OR 'Natural-Knee Flex System' OR 'NexGen' OR 'Optetrak' OR 'OrthoGlide' OR 'Oxinium' OR 'Persona Knee System' OR 'Press-Fit Condylar' OR 'Profix' OR 'Repicci' OR 'Restoris' OR 'Scorpio' OR 'Search Evolution' OR 'Segmental Knee System' OR 'Series 7000' OR 'Sigma' OR 'Triathlon' OR 'Tricon knee' OR 'UniCAP' OR 'Vanguard' OR 'Advance Total Knee' OR 'Alegretto' OR 'EIUS' OR 'UC Plus Solution' OR 'Uni-Knee' OR 'Uniglide' OR '3DKnee' OR 'Advance Stature Knee' OR 'HemiCAP' OR 'Dual Articular 2000' OR 'Endo-Model' OR 'Endo-Modell' OR 'Endomodel' OR 'EnduRo' OR 'LCS Complete' OR 'Oxford' OR 'P.F.C. Sigma' OR 'PFC Sigma' OR 'Rotaflex' OR 'S-ROM Noiles' OR 'Avon' OR 'Regenerex'):ab,ti))

OR

((('knee osteoarthritis'/de OR 'osteoarthritis'/de OR 'avascular necrosis'/de OR 'bone necrosis'/de OR (osteoarthriti\* OR arthriti\* OR osteoarthrosis OR osteoarthroses OR arthrosis OR arthroses OR arthropathy OR 'degenerative joint disease\*' OR 'gonarthrosis' OR ((avascular OR bone) NEAR/3 (necrosis OR infarction)) OR osteonecrosis OR osteoradionecrosis):ab,ti)

AND

('knee arthroplasty'/exp OR 'total knee arthroplasty'/de OR 'knee prosthesis'/de OR 'femoral knee prosthesis'/de OR 'hinge knee prosthesis'/exp OR 'patella prosthesis'/de OR 'patellofemoral prosthesis'/de OR 'tibial knee prosthesis'/de OR 'total knee prosthesis'/de OR 'unicompartmental knee prosthesis'/de OR (((knee OR femorotibial OR patella\* OR patellofemoral) NEAR/3 (replacement\* OR reconstruct\* OR arthroplast\* OR prosthes\* OR arthroprosthes\* OR endoprosthes\* OR implant\*)) OR 'artificial knee\*' OR TKR OR TKA OR 'Active UKA' OR 'Advance Medial Pivot' OR 'Advantim' OR 'ALPINA PS' OR 'Anatomic Graduated Component' OR 'Ascent' OR 'ATTUNE' OR 'Bi-Surface' OR 'Duracon' OR 'EMPOWR' OR 'Genesis II' OR 'iBalance Unicdylar Knee' OR 'Insall-Burstein II' OR 'InterSpace Knee' OR 'KineMax' OR 'KineSpring' OR 'Legion' OR 'Marmor' OR 'Maxim' OR 'Maximum Congruent Knee system' OR 'Miller-Galante' OR 'Natural Knee II' OR 'Natural-Knee Flex System' OR 'NexGen' OR 'Optetrak' OR 'OrthoGlide' OR 'Oxinium' OR 'Persona Knee System' OR 'Press-Fit Condylar' OR 'Profix' OR 'Repicci' OR 'Restoris' OR 'Scorpio' OR 'Search Evolution' OR 'Segmental Knee System' OR 'Series 7000' OR 'Sigma' OR 'Triathlon' OR 'Tricon knee' OR 'UniCAP' OR 'Vanguard' OR 'Advance Total Knee' OR 'Alegretto' OR 'EIUS' OR 'UC Plus Solution' OR 'Uni-Knee' OR 'Uniglide' OR '3DKnee' OR 'Advance Stature Knee' OR 'HemiCAP' OR 'Dual Articular 2000' OR 'Endo-Model' OR 'Endo-Modell' OR 'Endomodel' OR 'Enduro' OR 'LCS Complete' OR 'Oxford' OR 'P.F.C. Sigma' OR 'PFC Sigma' OR 'Rotaflex' OR 'S-ROM Noiles' OR 'Avon' OR 'Regenerex'):ab,ti)))

AND

('muscle strength'/de OR 'muscle weakness'/de OR 'torque'/de OR 'hip abductor muscle'/de OR 'pelvic movement'/de OR (((muscle OR muscular) NEAR/3 (strength OR power OR force OR weakness OR weakening OR insufficiency OR fatigue OR deficit\*)) OR torque OR 'torsional moment\*' OR 'turning force\*' OR newton-meter\* OR 'hip abduct\*' OR gluteus OR 'gluteal muscle\*' OR 'abduction motion' OR ((pelvic OR pelvis) NEAR/3 movement\*)):ab,ti)

NOT

((('animal'/de OR 'animal experiment'/exp OR 'nonhuman'/de) NOT ('human'/exp OR 'human experiment'/de))

### Ovid Medline

(20191219; 449 hits)

((('osteoarthritis, knee'/ OR (((knee OR femorotibial OR patellofemoral) ADJ5 (osteoarthriti\* OR arthriti\* OR osteoarthrosis OR osteoarthroses OR arthrosis OR arthroses OR arthropathy OR degenerative joint disease\*)) OR gonarthrosis).ab,ti.)

AND

(arthroplasty, replacement, knee/ OR arthroplasty/ OR arthroplasty, replacement/ OR knee prosthesis/ OR joint prosthesis/ OR "prostheses and implants"/ OR minimally invasive surgical procedures/ OR (replacement\* OR reconstruct\* OR arthroplast\* OR prosthes\* OR arthroprosthes\* OR endoprosthes\* OR implant\* OR artificial knee\* OR TKR OR TKA OR ((minimally invasive OR mini-invasive OR minimal OR minimal access) ADJ3 (surgery OR surgical method\* OR surgical procedure\* OR surgical technique\* OR operation OR operative treatment OR operative intervention OR operative repair OR operative restoration)) OR Active UKA OR Advance Medial Pivot OR Advantim OR ALPINA PS OR Anatomic Graduated Component OR Ascent OR ATTUNE OR Bi-Surface OR Duracon OR EMPOWR OR Genesis II OR iBalance Unicdylar Knee OR Insall-Burstein II OR InterSpace Knee OR KineMax OR KineSpring OR Legion OR Marmor OR Maxim OR Maximum Congruent Knee system OR Miller-Galante OR Natural Knee II OR Natural-Knee Flex System OR NexGen OR Optetrak OR

OrthoGlide OR Oxinium OR Persona Knee System OR Press-Fit Condylar OR Profix OR Repicci OR Restoris OR Scorpio OR Search Evolution OR Segmental Knee System OR Series 7000 OR Sigma OR Triathlon OR Tricon knee OR UniCAP OR Vanguard OR Advance Total Knee OR Alegretto OR EIUS OR UC Plus Solution OR Uni-Knee OR Uniglide OR 3DKnee OR Advance Stature Knee OR HemiCAP OR Dual Articular 2000 OR Endo-Model OR Endo-Modell OR Endomodel OR EnduRo OR LCS Complete OR Oxford OR PFC Sigma OR Rotaflex OR S-ROM Noiles OR Avon OR Regenerex).ab,ti.)

OR

((osteoarthritis, knee/ OR osteoarthritis/ OR osteonecrosis/ OR (osteoarthriti\* OR arthriti\* OR osteoarthrosis OR osteoarthroses OR arthrosis OR arthroses OR arthropathy OR degenerative joint disease\* OR gonarthrosis OR ((avascular OR bone) ADJ3 (necrosis OR infarction)) OR osteonecrosis OR osteoradionecrosis).ab,ti.)

AND

(arthroplasty, replacement, knee/ OR knee prosthesis/ OR (((knee OR femorotibial OR patella\* OR patellofemoral) ADJ3 (replacement\* OR reconstruct\* OR arthroplast\* OR prosthes\* OR arthroprosthes\* OR endoprosthesis\* OR implant\*)) OR artificial knee\* OR TKR OR TKA OR Active UKA OR Advance Medial Pivot OR Advantim OR ALPINA PS OR Anatomic Graduated Component OR Ascent OR ATTUNE OR Bi-Surface OR Duracon OR EMPOWR OR Genesis II OR iBalance Unicdylar Knee OR Insall-Burstein II OR InterSpace Knee OR KineMax OR KineSpring OR Legion OR Marmor OR Maxim OR Maximum Congruent Knee system OR Miller-Galante OR Natural Knee II OR Natural-Knee Flex System OR NexGen OR Optetrak OR OrthoGlide OR Oxinium OR Persona Knee System OR Press-Fit Condylar OR Profix OR Repicci OR Restoris OR Scorpio OR Search Evolution OR Segmental Knee System OR Series 7000 OR Sigma OR Triathlon OR Tricon knee OR UniCAP OR Vanguard OR Advance Total Knee OR Alegretto OR EIUS OR UC Plus Solution OR Uni-Knee OR Uniglide OR 3DKnee OR Advance Stature Knee OR HemiCAP OR Dual Articular 2000 OR Endo-Model OR Endo-Modell OR Endomodel OR EnduRo OR LCS Complete OR Oxford OR PFC Sigma OR Rotaflex OR S-ROM Noiles OR Avon OR Regenerex).ab,ti.)))

AND

(muscle strength/ OR muscle weakness/ OR torque/ OR (((muscle OR muscular) ADJ3 (strength OR power OR force OR weakness OR weakening OR insufficiency OR fatigue OR deficit\*)) OR torque OR torsional moment\* OR turning force\* OR newton-meter\* OR hip abduct\* OR gluteus OR gluteal muscle\* OR abduction motion OR ((pelvic OR pelvis) ADJ3 movement\*).ab,ti.)

NOT

(exp animals/ NOT humans/)

## SportDiscus

(20191219; 283 hits)

(((((TI knee OR AB knee OR TI femorotibial OR AB femorotibial OR TI patellofemoral OR AB patellofemoral) N5 (TI osteoarthriti\* OR AB osteoarthriti\* OR TI arthriti\* OR AB arthriti\* OR TI osteoarthrosis OR AB osteoarthrosis OR TI osteoarthroses OR AB osteoarthroses OR TI arthrosis OR AB arthrosis OR TI arthroses OR AB arthroses OR TI arthropathy OR AB arthropathy OR TI "degenerative joint disease\*" OR AB "degenerative joint disease\*")) OR TI gonarthrosis OR AB gonarthrosis)) AND (DE "ARTHROPLASTY" OR DE "TOTAL knee replacement" OR DE "ARTIFICIAL joints" OR DE "PROSTHETICS" OR DE "ARTIFICIAL knees" OR (TI replacement\* OR AB replacement\*

OR TI reconstruct\* OR AB reconstruct\* OR TI arthroplast\* OR AB arthroplast\* OR TI prosthes\* OR AB prosthes\* OR TI arthroprosthes\* OR AB arthroprosthes\* OR TI endoprosthesis\* OR AB endoprosthesis\* OR TI implant\* OR AB implant\* OR TI "artificial knee\*" OR AB "artificial knee\*" OR TI TKR OR AB TKR OR TI TKA OR AB TKA OR ((TI "minimally invasive" OR AB "minimally invasive" OR TI mini-invasive OR AB mini-invasive OR TI minimal OR AB minimal OR TI "minimal access" OR AB "minimal access")) N3 (TI surgery OR AB surgery OR TI "surgical method\*" OR AB "surgical method\*" OR TI "surgical procedure\*" OR AB "surgical procedure\*" OR TI "surgical technique\*" OR AB "surgical technique\*" OR TI operation OR AB operation OR TI "operative treatment" OR AB "operative treatment" OR TI "operative intervention" OR AB "operative intervention" OR TI "operative repair" OR AB "operative repair" OR TI "operative restoration" OR AB "operative restoration")) OR TI "Active UKA" OR AB "Active UKA" OR TI "Advance Medial Pivot" OR AB "Advance Medial Pivot" OR TI Advantim OR AB Advantim OR TI "ALPINA PS" OR AB "ALPINA PS" OR TI "Anatomic Graduated Component" OR AB "Anatomic Graduated Component" OR TI Ascent OR AB Ascent OR TI ATTUNE OR AB ATTUNE OR TI Bi-Surface OR AB Bi-Surface OR TI Duracon OR AB Duracon OR TI EMPOWR OR AB EMPOWR OR TI "Genesis II" OR AB "Genesis II" OR TI "iBalance Unicondylar Knee" OR AB "iBalance Unicondylar Knee" OR TI "Insall-Burstein II" OR AB "Insall-Burstein II" OR TI "InterSpace Knee" OR AB "InterSpace Knee" OR TI KineMax OR AB KineMax OR TI KineSpring OR AB KineSpring OR TI Legion OR AB Legion OR TI Marmor OR AB Marmor OR TI Maxim OR AB Maxim OR TI "Maximum Congruent Knee system" OR AB "Maximum Congruent Knee system" OR TI Miller-Galante OR AB Miller-Galante OR TI "Natural Knee II" OR AB "Natural Knee II" OR TI "Natural-Knee Flex System" OR AB "Natural-Knee Flex System" OR TI NexGen OR AB NexGen OR TI Optetrak OR AB Optetrak OR TI OrthoGlide OR AB OrthoGlide OR TI Oxinium OR AB Oxinium OR TI "Persona Knee System" OR AB "Persona Knee System" OR TI "Press-Fit Condylar" OR AB "Press-Fit Condylar" OR TI Profix OR AB Profix OR TI Repicci OR AB Repicci OR TI Restoris OR AB Restoris OR TI Scorpio OR AB Scorpio OR TI "Search Evolution" OR AB "Search Evolution" OR TI "Segmental Knee System" OR AB "Segmental Knee System" OR TI Series OR AB Series OR TI Sigma OR AB Sigma OR TI Triathlon OR AB Triathlon OR TI "Tricon knee" OR AB "Tricon knee" OR TI UniCAP OR AB UniCAP OR TI Vanguard OR AB Vanguard OR TI "Advance Total Knee" OR AB "Advance Total Knee" OR TI Alegretto OR AB Alegretto OR TI EIUS OR AB EIUS OR TI "UC Plus Solution" OR AB "UC Plus Solution" OR TI Uni-Knee OR AB Uni-Knee OR TI Uniglide OR AB Uniglide OR TI DKnee OR AB DKnee OR TI "Advance Stature Knee" OR AB "Advance Stature Knee" OR TI HemiCAP OR AB HemiCAP OR TI "Dual Articular" OR AB "Dual Articular" OR TI Endo-Model OR AB Endo-Model OR TI Endo-Modell OR AB Endo-Modell OR TI Endomodel OR AB Endomodel OR TI EnduRo OR AB EnduRo OR TI "LCS Complete" OR AB "LCS Complete" OR TI Oxford OR AB Oxford OR TI "PFC Sigma" OR AB "PFC Sigma" OR TI Rotaflex OR AB Rotaflex OR TI "S-ROM Noiles" OR AB "S-ROM Noiles" OR TI Avon OR AB Avon OR TI Regenerex OR AB Regenerex))) OR ((DE "OSTEOARTHRITIS" OR DE "OSTEONECROSIS" OR DE "OSTEOCHONDROSIS" OR (TI osteoarthritis\* OR AB osteoarthritis\* OR TI arthriti\* OR AB arthriti\* OR TI osteoarthrosis OR AB osteoarthrosis OR TI osteoarthroses OR AB osteoarthroses OR TI arthrosis OR AB arthrosis OR TI arthroses OR AB arthroses OR TI arthropathy OR AB arthropathy OR TI "degenerative joint disease\*" OR AB "degenerative joint disease\*" OR TI gonarthrosis OR AB gonarthrosis OR ((TI avascular OR AB avascular OR TI bone OR AB bone) N3 (TI necrosis OR AB necrosis OR TI infarction OR AB infarction)) OR TI osteonecrosis OR AB osteonecrosis OR TI osteoradionecrosis OR AB osteoradionecrosis)) AND (DE "TOTAL knee replacement" OR DE "ARTIFICIAL knees" OR (((TI knee OR AB knee OR TI femorotibial OR AB femorotibial OR TI patella\* OR AB patella\* OR TI patellofemoral OR AB patellofemoral) N3 (TI replacement\* OR AB replacement\* OR TI reconstruct\* OR AB reconstruct\* OR TI arthroplast\* OR AB arthroplast\* OR TI prosthes\* OR AB prosthes\* OR TI arthroprosthes\* OR AB arthroprosthes\* OR TI endoprosthesis\* OR AB endoprosthesis\* OR TI implant\* OR AB implant\*)) OR TI "artificial knee\*" OR AB "artificial knee\*" OR TI TKR OR AB TKR OR TI TKA OR AB TKA OR TI "Active UKA" OR AB "Active UKA" OR TI "Advance Medial Pivot" OR AB "Advance Medial Pivot" OR TI Advantim OR AB Advantim OR TI "ALPINA PS" OR AB "ALPINA PS" OR TI

"Anatomic Graduated Component" OR AB "Anatomic Graduated Component" OR TI Ascent OR AB Ascent OR TI ATTUNE OR AB ATTUNE OR TI Bi-Surface OR AB Bi-Surface OR TI Duracon OR AB Duracon OR TI EMPOWR OR AB EMPOWR OR TI "Genesis II" OR AB "Genesis II" OR TI "iBalance Unicondylar Knee" OR AB "iBalance Unicondylar Knee" OR TI "Insall-Burstein II" OR AB "Insall-Burstein II" OR TI "InterSpace Knee" OR AB "InterSpace Knee" OR TI KineMax OR AB KineMax OR TI KineSpring OR AB KineSpring OR TI Legion OR AB Legion OR TI Marmor OR AB Marmor OR TI Maxim OR AB Maxim OR TI "Maximum Congruent Knee system" OR AB "Maximum Congruent Knee system" OR TI Miller-Galante OR AB Miller-Galante OR TI "Natural Knee II" OR AB "Natural Knee II" OR TI "Natural-Knee Flex System" OR AB "Natural-Knee Flex System" OR TI NexGen OR AB NexGen OR TI Optetrak OR AB Optetrak OR TI OrthoGlide OR AB OrthoGlide OR TI Oxinium OR AB Oxinium OR TI "Persona Knee System" OR AB "Persona Knee System" OR TI "Press-Fit Condylar" OR AB "Press-Fit Condylar" OR TI Profix OR AB Profix OR TI Repicci OR AB Repicci OR TI Restoris OR AB Restoris OR TI Scorpio OR AB Scorpio OR TI "Search Evolution" OR AB "Search Evolution" OR TI "Segmental Knee System" OR AB "Segmental Knee System" OR TI Series OR AB Series OR TI Sigma OR AB Sigma OR TI Triathlon OR AB Triathlon OR TI "Tricon knee" OR AB "Tricon knee" OR TI UniCAP OR AB UniCAP OR TI Vanguard OR AB Vanguard OR TI "Advance Total Knee" OR AB "Advance Total Knee" OR TI Alegretto OR AB Alegretto OR TI EIUS OR AB EIUS OR TI "UC Plus Solution" OR AB "UC Plus Solution" OR TI Uni-Knee OR AB Uni-Knee OR TI Uniglide OR AB Uniglide OR TI DKnee OR AB DKnee OR TI "Advance Stature Knee" OR AB "Advance Stature Knee" OR TI HemiCAP OR AB HemiCAP OR TI "Dual Articular" OR AB "Dual Articular" OR TI Endo-Model OR AB Endo-Model OR TI Endo-Modell OR AB Endo-Modell OR TI Endomodel OR AB Endomodel OR TI EnduRo OR AB EnduRo OR TI "LCS Complete" OR AB "LCS Complete" OR TI Oxford OR AB Oxford OR TI "PFC Sigma" OR AB "PFC Sigma" OR TI Rotaflex OR AB Rotaflex OR TI "S-ROM Noiles" OR AB "S-ROM Noiles" OR TI Avon OR AB Avon OR TI Regenerex OR AB Regenerex))) AND (DE "MUSCLE strength" OR DE "MUSCLE weakness" OR DE "TORQUE" OR DE "GLUTEAL muscles" OR DE "GLUTEUS medius" OR DE "GLUTEUS minimus" OR DE "PIRIFORMIS muscle" OR ((TI muscle OR AB muscle OR TI muscular OR AB muscular) N3 (TI strength OR AB strength OR TI power OR AB power OR TI force OR AB force OR TI weakness OR AB weakness OR TI weakening OR AB weakening OR TI insufficiency OR AB insufficiency OR TI fatigue OR AB fatigue OR TI deficit\* OR AB deficit\*)) OR TI torque OR AB torque OR TI "torsional moment\*" OR AB "torsional moment\*" OR TI "turning force\*" OR AB "turning force\*" OR TI newton-meter\* OR AB newton-meter\* OR TI "hip abduct\*" OR AB "hip abduct\*" OR TI gluteus OR AB gluteus OR TI "gluteal muscle\*" OR AB "gluteal muscle\*" OR TI "abduction motion" OR AB "abduction motion" OR ((TI pelvic OR AB pelvic OR TI pelvis OR AB pelvis) N3 TI movement\* OR AB movement\*)))))

### Web of Science Core Collection

(20191219; 662 hits)

TS=(((((((knee OR femorotibial OR patellofemoral) NEAR/5 (osteoarthriti\* OR arthriti\* OR osteoarthrosis OR osteoarthroses OR arthrosis OR arthroses OR arthropathy OR "degenerative joint disease\*")) OR "gonarthrosis")) AND (replacement\* OR reconstruct\* OR arthroplast\* OR prosthes\* OR arthroprosthes\* OR endoprothes\* OR implant\* OR "artificial knee\*" OR TKR OR TKA OR ("minimally invasive" OR mini-invasive OR minimal OR "minimal access") NEAR/2 (surgery OR "surgical method\*" OR "surgical procedure\*" OR "surgical technique\*" OR operation OR "operative treatment" OR "operative intervention" OR "operative repair" OR "operative restoration")) OR "Active UKA" OR "Advance Medial Pivot" OR "Advantim" OR "ALPINA PS" OR "Anatomic Graduated Component" OR "Ascent" OR "ATTUNE" OR "Bi-Surface" OR "Duracon" OR "EMPOWR" OR "Genesis II" OR "iBalance Unicondylar Knee" OR "Insall-Burstein II" OR "InterSpace Knee" OR "KineMax" OR "KineSpring" OR "Legion" OR "Marmor" OR "Maxim" OR "Maximum Congruent Knee system" OR

"Miller-Galante" OR "Natural Knee II" OR "Natural-Knee Flex System" OR "NexGen" OR "Optetrak" OR "OrthoGlide" OR "Oxinium" OR "Persona Knee System" OR "Press-Fit Condylar" OR "Profix" OR "Repicci" OR "Restoris" OR "Scorpio" OR "Search Evolution" OR "Segmental Knee System" OR "Series 7000" OR "Sigma" OR "Triathlon" OR "Tricon knee" OR "UniCAP" OR "Vanguard" OR "Advance Total Knee" OR "Alegretto" OR "EIUS" OR "UC Plus Solution" OR "Uni-Knee" OR "Uniglide" OR "3DKnee" OR "Advance Stature Knee" OR "HemiCAP" OR "Dual Articular 2000" OR "Endo-Model" OR "Endo-Modell" OR "Endomodel" OR "Enduro" OR "LCS Complete" OR "Oxford" OR "P.F.C. Sigma" OR "PFC Sigma" OR "Rotaflex" OR "S-ROM Noiles" OR "Avon" OR "Regenerex")) OR ((osteoarthritis\* OR arthriti\* OR osteoarthritis OR osteoarthroses OR arthrosis OR arthroses OR arthropathy OR "degenerative joint disease\*" OR "gonarthrosis" OR ((avascular OR bone) NEAR/2 (necrosis OR infarction)) OR osteonecrosis OR osteoradionecrosis) AND (((knee OR femorotibial OR patella\* OR patellofemoral) NEAR/2 (replacement\* OR reconstruct\* OR arthroplast\* OR prosthes\* OR arthroprosthes\* OR endoprosthesis\* OR implant\*)) OR "artificial knee\*" OR TKR OR TKA OR "Active UKA" OR "Advance Medial Pivot" OR "Advantim" OR "ALPINA PS" OR "Anatomic Graduated Component" OR "Ascent" OR "ATTUNE" OR "Bi-Surface" OR "Duracon" OR "EMPOWR" OR "Genesis II" OR "iBalance Unicondylar Knee" OR "Insall-Burstein II" OR "InterSpace Knee" OR "KineMax" OR "KineSpring" OR "Legion" OR "Marmor" OR "Maxim" OR "Maximum Congruent Knee system" OR "Miller-Galante" OR "Natural Knee II" OR "Natural-Knee Flex System" OR "NexGen" OR "Optetrak" OR "OrthoGlide" OR "Oxinium" OR "Persona Knee System" OR "Press-Fit Condylar" OR "Profix" OR "Repicci" OR "Restoris" OR "Scorpio" OR "Search Evolution" OR "Segmental Knee System" OR "Series 7000" OR "Sigma" OR "Triathlon" OR "Tricon knee" OR "UniCAP" OR "Vanguard" OR "Advance Total Knee" OR "Alegretto" OR "EIUS" OR "UC Plus Solution" OR "Uni-Knee" OR "Uniglide" OR "3DKnee" OR "Advance Stature Knee" OR "HemiCAP" OR "Dual Articular 2000" OR "Endo-Model" OR "Endo-Modell" OR "Endomodel" OR "Enduro" OR "LCS Complete" OR "Oxford" OR "P.F.C. Sigma" OR "PFC Sigma" OR "Rotaflex" OR "S-ROM Noiles" OR "Avon" OR "Regenerex")) AND (((muscle OR muscular) NEAR/2 (strength OR power OR force OR weakness OR weakening OR insufficiency OR fatigue OR deficit\*)) OR torque OR "torsional moment\*" OR "turning force\*" OR newton-meter\* OR "hip abduct\*" OR gluteus OR "gluteal muscle\*" OR "abduction motion" OR ((pelvic OR pelvis) NEAR/2 movement\*))

## Scopus

(20191219; 993 hits)

TITLE-ABS-KEY((((((knee OR femorotibial OR patellofemoral) W/5 (osteoarthritis\* OR arthriti\* OR osteoarthritis OR osteoarthroses OR arthrosis OR arthroses OR arthropathy OR "degenerative joint disease\*")) OR "gonarthrosis")) AND (replacement\* OR reconstruct\* OR arthroplast\* OR prosthes\* OR arthroprosthes\* OR endoprosthesis\* OR implant\* OR "artificial knee\*" OR TKR OR TKA OR ("minimally invasive" OR mini-invasive OR minimal OR "minimal access")) W/2 (surgery OR "surgical method\*" OR "surgical procedure\*" OR "surgical technique\*" OR operation OR "operative treatment" OR "operative intervention" OR "operative repair" OR "operative restoration")) OR "Active UKA" OR "Advance Medial Pivot" OR "Advantim" OR "ALPINA PS" OR "Anatomic Graduated Component" OR "Ascent" OR "ATTUNE" OR "Bi-Surface" OR "Duracon" OR "EMPOWR" OR "Genesis II" OR "iBalance Unicondylar Knee" OR "Insall-Burstein II" OR "InterSpace Knee" OR "KineMax" OR "KineSpring" OR "Legion" OR "Marmor" OR "Maxim" OR "Maximum Congruent Knee system" OR "Miller-Galante" OR "Natural Knee II" OR "Natural-Knee Flex System" OR "NexGen" OR "Optetrak" OR "OrthoGlide" OR "Oxinium" OR "Persona Knee System" OR "Press-Fit Condylar" OR "Profix" OR "Repicci" OR "Restoris" OR "Scorpio" OR "Search Evolution" OR "Segmental Knee System" OR "Series 7000" OR "Sigma" OR "Triathlon" OR "Tricon knee" OR "UniCAP" OR "Vanguard" OR "Advance Total

Knee" OR "Alegretto" OR "EIUS" OR "UC Plus Solution" OR "Uni-Knee" OR "Uniglide" OR "3DKnee" OR "Advance Stature Knee" OR "HemiCAP" OR "Dual Articular 2000" OR "Endo-Model" OR "Endo-Modell" OR "Endomodel" OR "EnduRo" OR "LCS Complete" OR "Oxford" OR "P.F.C. Sigma" OR "PFC Sigma" OR "Rotaflex" OR "S-ROM Noiles" OR "Avon" OR "Regenerex")) OR ((osteoarthriti\* OR arthriti\* OR osteoarthrosis OR osteoarthroses OR arthrosis OR arthroses OR arthropathy OR "degenerative joint disease\*" OR "gonarthrosis" OR ((avascular OR bone) W/2 (necrosis OR infarction)) OR osteonecrosis OR osteoradionecrosis) AND (((knee OR femorotibial OR patella\* OR patellofemoral) W/2 (replacement\* OR reconstruct\* OR arthroplast\* OR prosthes\* OR arthroprosthes\* OR endoprothes\* OR implant\*)) OR "artificial knee\*" OR TKR OR TKA OR "Active UKA" OR "Advance Medial Pivot" OR "Advantim" OR "ALPINA PS" OR "Anatomic Graduated Component" OR "Ascent" OR "ATTUNE" OR "Bi-Surface" OR "Duracon" OR "EMPOWR" OR "Genesis II" OR "iBalance Unicondylar Knee" OR "Insall-Burstein II" OR "InterSpace Knee" OR "KineMax" OR "KineSpring" OR "Legion" OR "Marmor" OR "Maxim" OR "Maximum Congruent Knee system" OR "Miller-Galante" OR "Natural Knee II" OR "Natural-Knee Flex System" OR "NexGen" OR "Optetrak" OR "OrthoGlide" OR "Oxinium" OR "Persona Knee System" OR "Press-Fit Condylar" OR "Profix" OR "Repicci" OR "Restoris" OR "Scorpio" OR "Search Evolution" OR "Segmental Knee System" OR "Series 7000" OR "Sigma" OR "Triathlon" OR "Tricon knee" OR "UniCAP" OR "Vanguard" OR "Advance Total Knee" OR "Alegretto" OR "EIUS" OR "UC Plus Solution" OR "Uni-Knee" OR "Uniglide" OR "3DKnee" OR "Advance Stature Knee" OR "HemiCAP" OR "Dual Articular 2000" OR "Endo-Model" OR "Endo-Modell" OR "Endomodel" OR "EnduRo" OR "LCS Complete" OR "Oxford" OR "P.F.C. Sigma" OR "PFC Sigma" OR "Rotaflex" OR "S-ROM Noiles" OR "Avon" OR "Regenerex")) AND (((muscle OR muscular) W/2 (strength OR power OR force OR weakness OR weakening OR insufficiency OR fatigue OR deficit\*)) OR torque OR "torsional moment\*" OR "turning force\*" OR newton-meter\* OR "hip abduct\*" OR gluteus OR "gluteal muscle\*" OR "abduction motion" OR ((pelvic OR pelvis) W/2 movement\*))
