# Supplementary material for: Hip abductor muscle strength in patients after total or unicompartmental knee arthroplasty for knee osteoarthritis or avascular necrosis: a systematic review and meta-analysis protocol
Source: PubMed Central journal article supplement — BMJ Open. 2020 Aug 13;10(8):e038770. doi: 10.1136/bmjopen-2020-038770 (PMC7430403; doi:10.1136/bmjopen-2020-038770), 2020-08-13
Supplement: bmjopen-2020-038770supp003.pdf [file bmjopen-2020-038770supp003.pdf]

## ADAPTED NEWCASTLE - OTTAWA QUALITY ASSESSMENT SCALE COHORT STUDIES

### Selection

1. Representativeness of the patient cohort \*
  - a) truly representative of the corresponding patient cohort in the general community (e.g. multi center trial with different types of hospitals) \*
  - b) somewhat representative of the corresponding patient cohort (e.g. single center study in only hospital of the catchment area) \*
  - c) selected group of patients
  - d) no or unclear description of the derivation of the patient cohort
2. Selection of the healthy control cohort<sup>[1][2]</sup> (if applicable)
  - a) drawn from the same community as the patient cohort \*
  - b) drawn from a different source<sup>[1][2]</sup>
  - c) no description of the derivation of the healthy cohort
3. Ascertainment of exposure<sup>[1][2]</sup> (not applicable)
4. Demonstration that outcome of interest was not present at start of study (not applicable)

### Comparability

1. Comparability of cohorts on the basis of the design or analysis<sup>[1][2]</sup> (if applicable)
  - a) study controls for age differences between cohorts (e.g. by matching or statistical adjustment for potential confounding) \*
  - b) study does not control for age differences between cohorts

### Outcome

1. Assessment of outcome
  - a) independent assessment (e.g. by nurses or researchers not involved in the study) \*
  - b) assessment by member of the research team
  - c) no information given
2. Was follow-up long enough for patients to recover?
  - a) yes (follow up at least 12 months) \*
  - b) no (follow up less than 12 months)

3. Adequacy of follow up of cohorts<sup>[17]</sup>
- a) complete follow up - all subjects accounted for \*
  - b) subjects lost to follow up unlikely to introduce bias (e.g. drop out because of medical complications) or at least 90% \*
  - c) follow up rate < 90 % or no description of those lost or description suggests bias
  - d) no statement
